# Supplementary material
Source: PubMed Central journal article supplement (PMC6638768)
Supplement: MPP-13-677-s005.pdf [file MPP-13-677-s005.pdf]

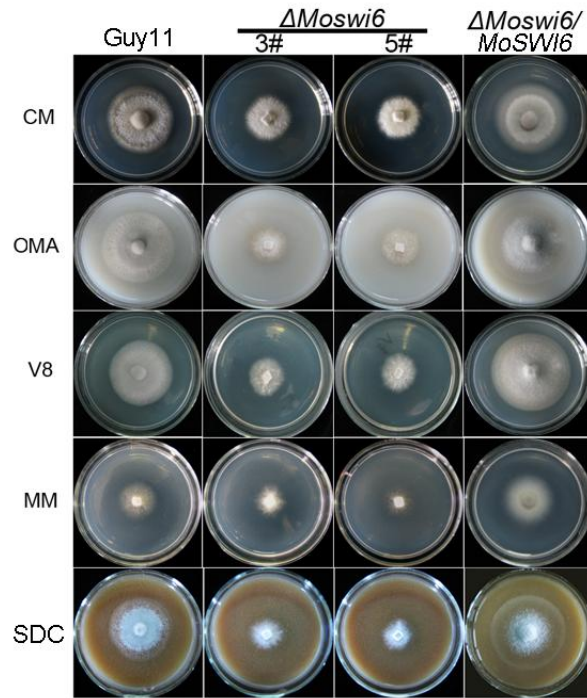

Fig. S5 Deletion *MoSWI6* resulted in reduced growth on various media. The  $\Delta Moswi6$  mutants displayed retarded growth on CM, OMA, V8, MM and SDC media.
